# Supplementary material for: Thermal Conductivity of Epoxy Resin Composites Filled with Combustion Synthesized h-BN Particles
Source: PubMed Central journal article supplement (PMC6273151; doi:10.3390/molecules21050670), 2016-05-20
Supplement: molecules-21-00670-s001.pdf [file molecules-21-00670-s001.pdf]

# Supplementary Materials: Thermal Conductivity of Epoxy Resin Composites Filled with Combustion Synthesized h-BN Particles

Shyan-Lung Chung and Jeng-Shung Lin

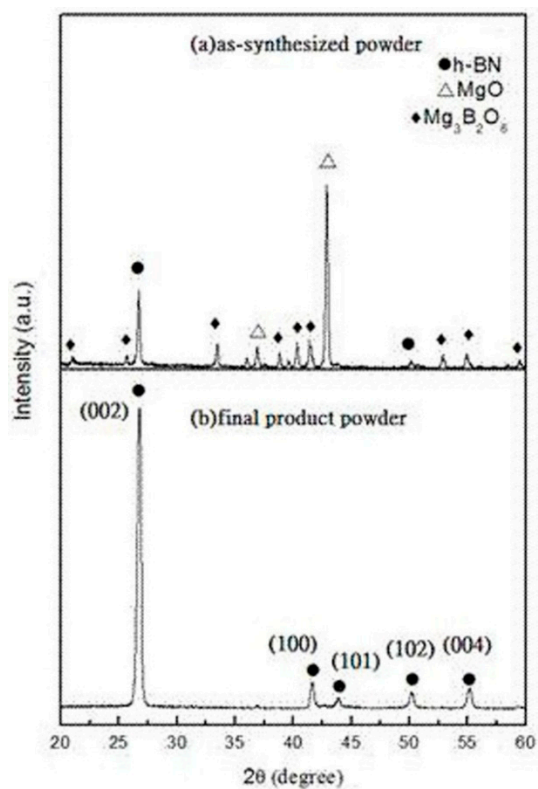

Figure S1. The X-ray diffraction pattern of h-BN (a) as-synthesized powder (b) final product powder.

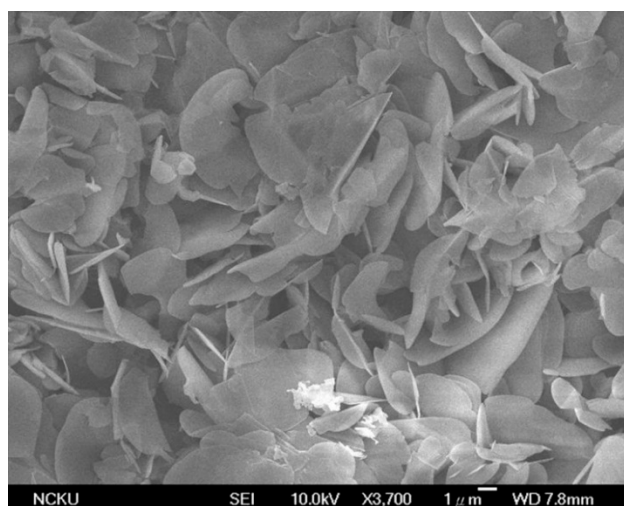

Figure S2. The scanning electron micrograph of h-BN powder with an average particle size of 10.6 μm.

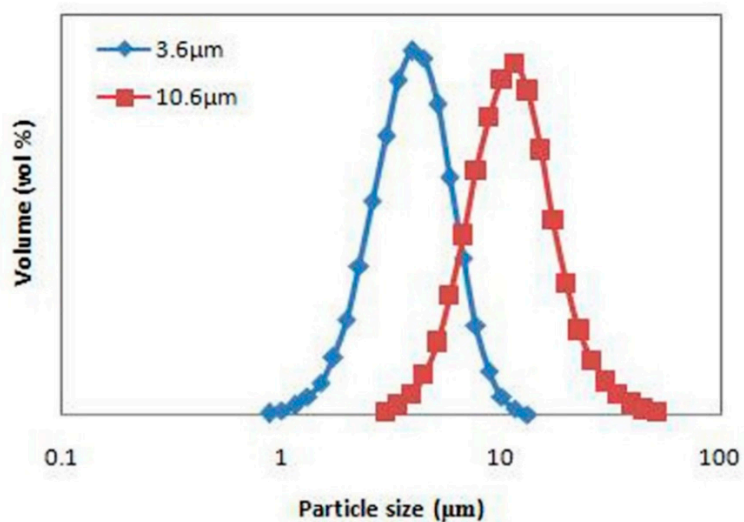

Figure S3. Particle size distribution of h-BN powder.

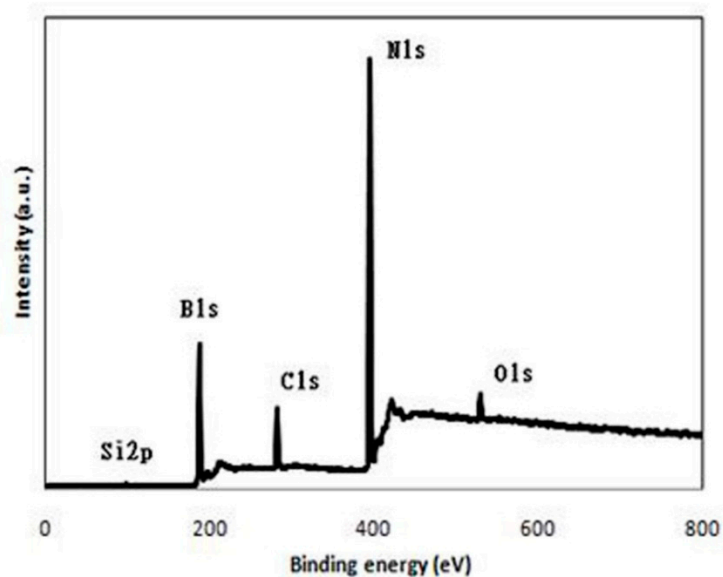

Figure S4. X-ray photoelectron spectroscopy of 2.4 wt % GPTMS-treated h-BN powders with an average particle size of 10.6  $\mu\text{m}$ .

Table S1. Charge corrected binding energies (eV) and possible assignment for silane GPTMS treated h-BN.

| Energy level     | Binding Energy (eV) | Assignment                      |
|------------------|---------------------|---------------------------------|
| C <sub>1s</sub>  | 285.0               | (CH <sub>2</sub> ) <sub>n</sub> |
|                  | 287.2               | C-O                             |
| Si <sub>2p</sub> | 102.1               | Organic silicone                |
| B <sub>1s</sub>  | 189.8               | BN                              |
| O <sub>1s</sub>  | 531.8               | Si-O                            |
| N <sub>1s</sub>  | 397.8               | BN                              |

**Table S2.** Fractional loss in weight of h-BN particles upon heating to 600 °C.

| Particle Size  | 3.6 $\mu\text{m}$ | 10.6 $\mu\text{m}$ |
|----------------|-------------------|--------------------|
| Naked powder   | 2.83%             | 0.68%              |
| Silane treated | 3.25%             | 0.83%              |

**Table S3.** The thermal conductivity of EMCs with various filler contents and particle sizes (with and without surface treatment).

| Particle Size, d50 ( $\mu\text{m}$ ) | Filler Content (vol %) | 10   | 20   | 30   | 40   | 50   | 60   | 70   | 80   |
|--------------------------------------|------------------------|------|------|------|------|------|------|------|------|
| 10.6                                 | native                 | 0.46 | 0.76 | 1.44 | 2.59 | 5.78 | 6.92 | 6.22 | 5.42 |
|                                      | treated                | 0.58 | 0.97 | 1.95 | 2.98 | 6.78 | 7.45 | 6.72 | 6.63 |
|                                      | $\Delta\text{K}$ %     | 26.1 | 27.6 | 35.4 | 15.1 | 17.3 | 7.7  | 8.0  | 22.3 |
| 3.6                                  | native                 | -    | -    | 1.34 | -    | 2.32 | 2.27 | 1.64 | 1.42 |
|                                      | treated                | -    | -    | 1.80 | -    | 2.79 | 2.73 | 2.14 | 1.77 |
|                                      | $\Delta\text{K}$ %     | -    | -    | 34.3 | -    | 20.3 | 20.3 | 30.5 | 24.6 |

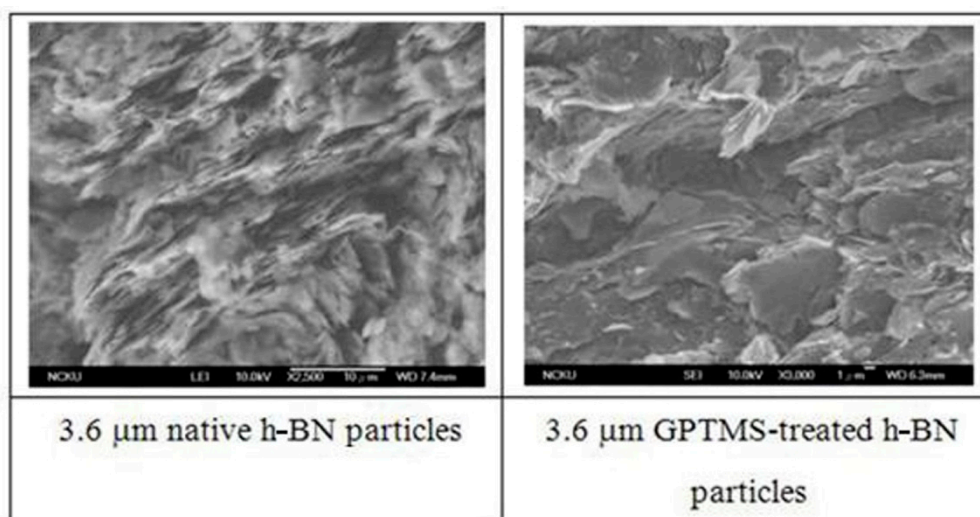**Figure S5.** SEM micrographs of cross-section of 3.6 wt % GPTMS-treated h-BN epoxy-matrix composites with an average particle size of 3.6  $\mu\text{m}$  (without polishing or etching).
